# Supplementary material for: Turning attention to tumor–host interface and focus on the peritumoral heterogeneity of glioblastoma
Source: PubMed Central journal article supplement — Nat Commun. 2024 Dec 30;15:10885. doi: 10.1038/s41467-024-55243-5 (PMC11685534; doi:10.1038/s41467-024-55243-5), 2024-12-30
Supplement: 41467_2024_55243_MOESM1_ESM.pdf [file 41467_2024_55243_MOESM1_ESM.pdf]

## Supplementary Information

### Turning attention to tumor-host interface and focus on the peritumoral heterogeneity of glioblastoma

Fang Wang<sup>1,2#</sup>, Jiawei Dong<sup>1,3#</sup>, Yuyun Xu<sup>4</sup>, Jiaqi Jin<sup>1</sup>, Yan Xu<sup>1</sup>, Xiuwei Yan<sup>1</sup>, Zhihui Liu<sup>1</sup>, Hongtao Zhao<sup>1</sup>, Jiheng Zhang<sup>1</sup>, Nan Wang<sup>1</sup>, Xueyan Hu<sup>1</sup>, Xin Gao<sup>1</sup>, Lei Xu<sup>1</sup>, Chengyun Yang<sup>1</sup>, Shuai Ma<sup>1</sup>, Jianyang Du<sup>1</sup>, Ying Hu<sup>1,5\*</sup>, Hang Ji<sup>1,6\*</sup>, Shaoshan Hu<sup>1\*</sup>.

<sup>1</sup>Department of Neurosurgery, Emergency Medicine Center, Zhejiang Provincial People's Hospital, Hangzhou Medical College, Hangzhou, Zhejiang, China.

<sup>2</sup>Department of Neurosurgery, The First Affiliated Hospital of Zhengzhou University, Zhengzhou, Henan, China.

<sup>3</sup>Department of Neurosurgery, The Second Affiliated Hospital of Harbin Medical University, Harbin, Heilongjiang, China.

<sup>4</sup>Department of Radiology, Zhejiang Provincial People's Hospital, Hangzhou Medical College, Hangzhou, Zhejiang, China.

<sup>5</sup>School of Life Science and Technology, Harbin Institute of Technology, Harbin, Heilongjiang, China.

<sup>6</sup> Department of Neurosurgery, West China Hospital Sichuan University, Chengdu, Sichuan, China.

**\*Corresponding author:** shaoshanhu421@163.com (Shaoshan Hu);  
jihang0723@163.com (Hang Ji); huying@hit.edu.cn (Ying Hu)

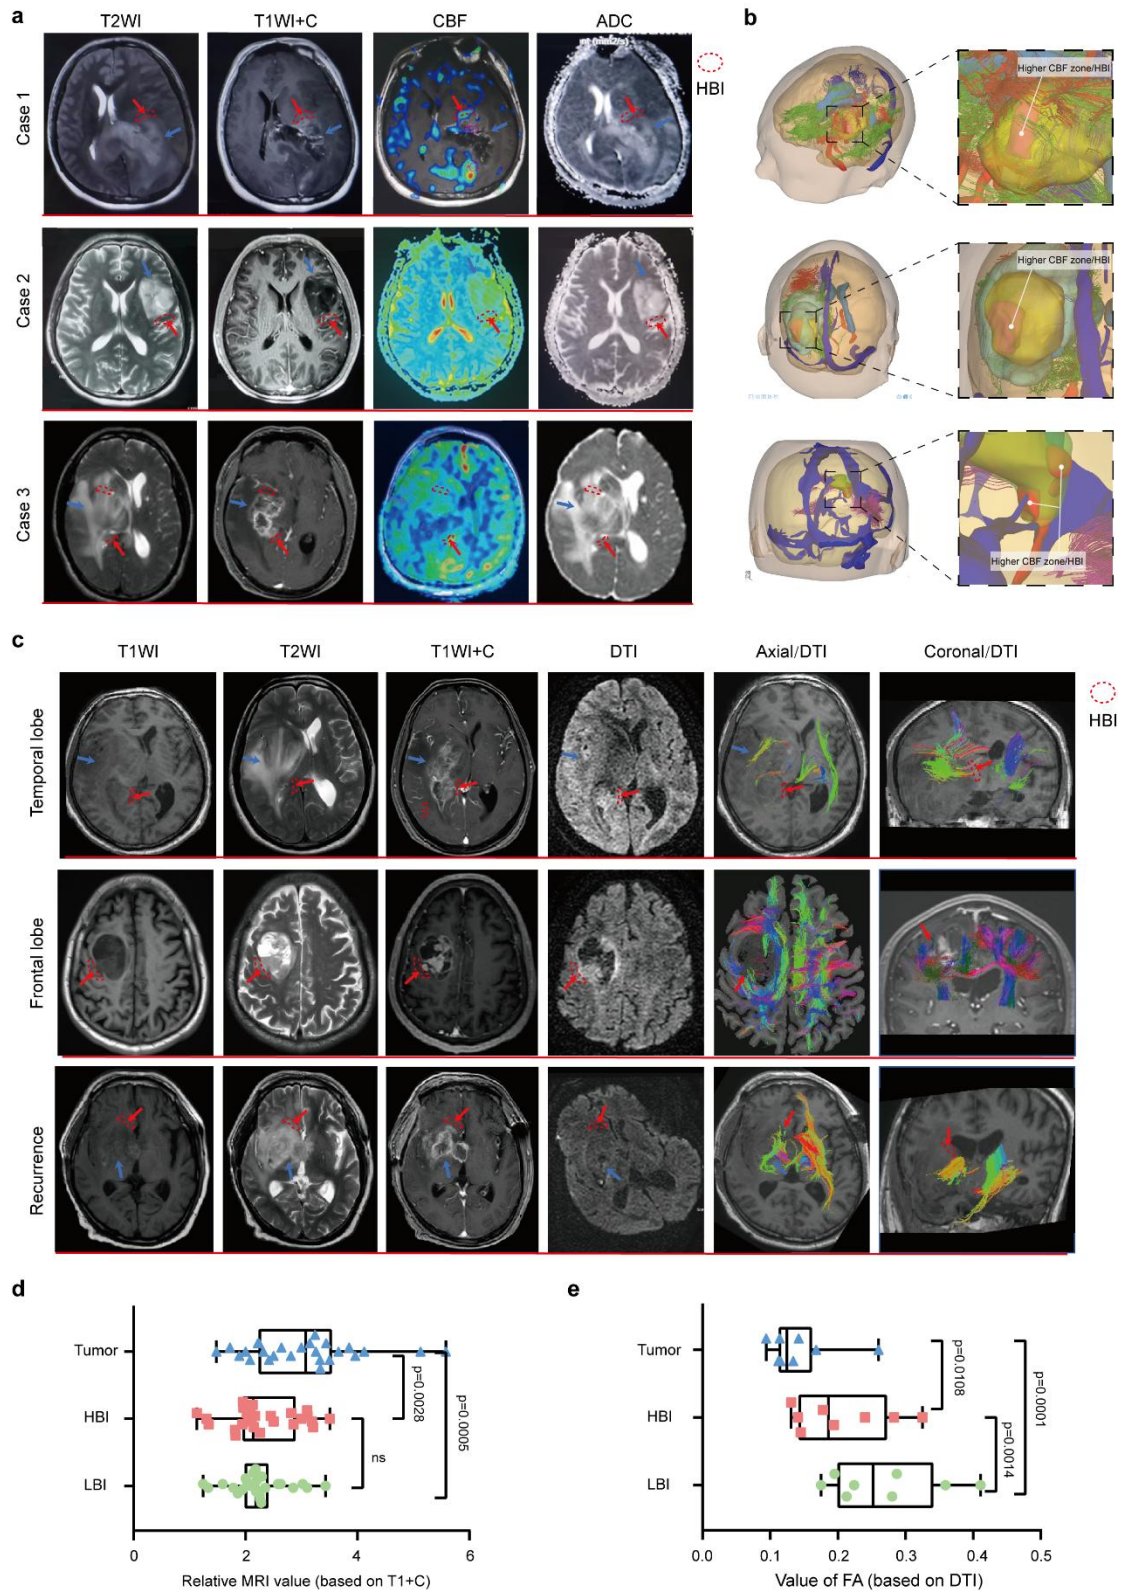

**Supplementary fig 1. Segmentation and features of LBI and HBI regions on MRI and 3D reconstruction images. a** Multimodal-MRI characteristics of HBI and LBI in different brain regions of GBM (n=26 independent subjects). The red dashed circles

denote the HBI areas. Red arrows point to HBI sampling sites and blue arrows to LBI sampling sites, respectively. **b** Representative 3D reconstruction images of the high CBF zone (HBI) around the tumor (n=26 independent subjects). **c** The nerve fiber bundles of the two regions (HBI and LBI). The red dashed circles denote the HBI areas (n=8 independent subjects). Red arrows point to HBI sampling sites and blue arrows to LBI sampling sites, respectively. **d** Statistical analysis of relative MRI value from T1WI+C images in various regions from patients (n = 26, image data from 26 subjects). **e** Statistical analysis of the FA value in various regions from patients (n = 8, image data from 8 subjects). Statistical analysis is performed using two-tailed Student's t-test in (d, e); ns=no significance. All box plots show median  $\pm$  25/75 percentiles with whiskers showing minimum and maximum values. Source data are provided as a Source Data file.

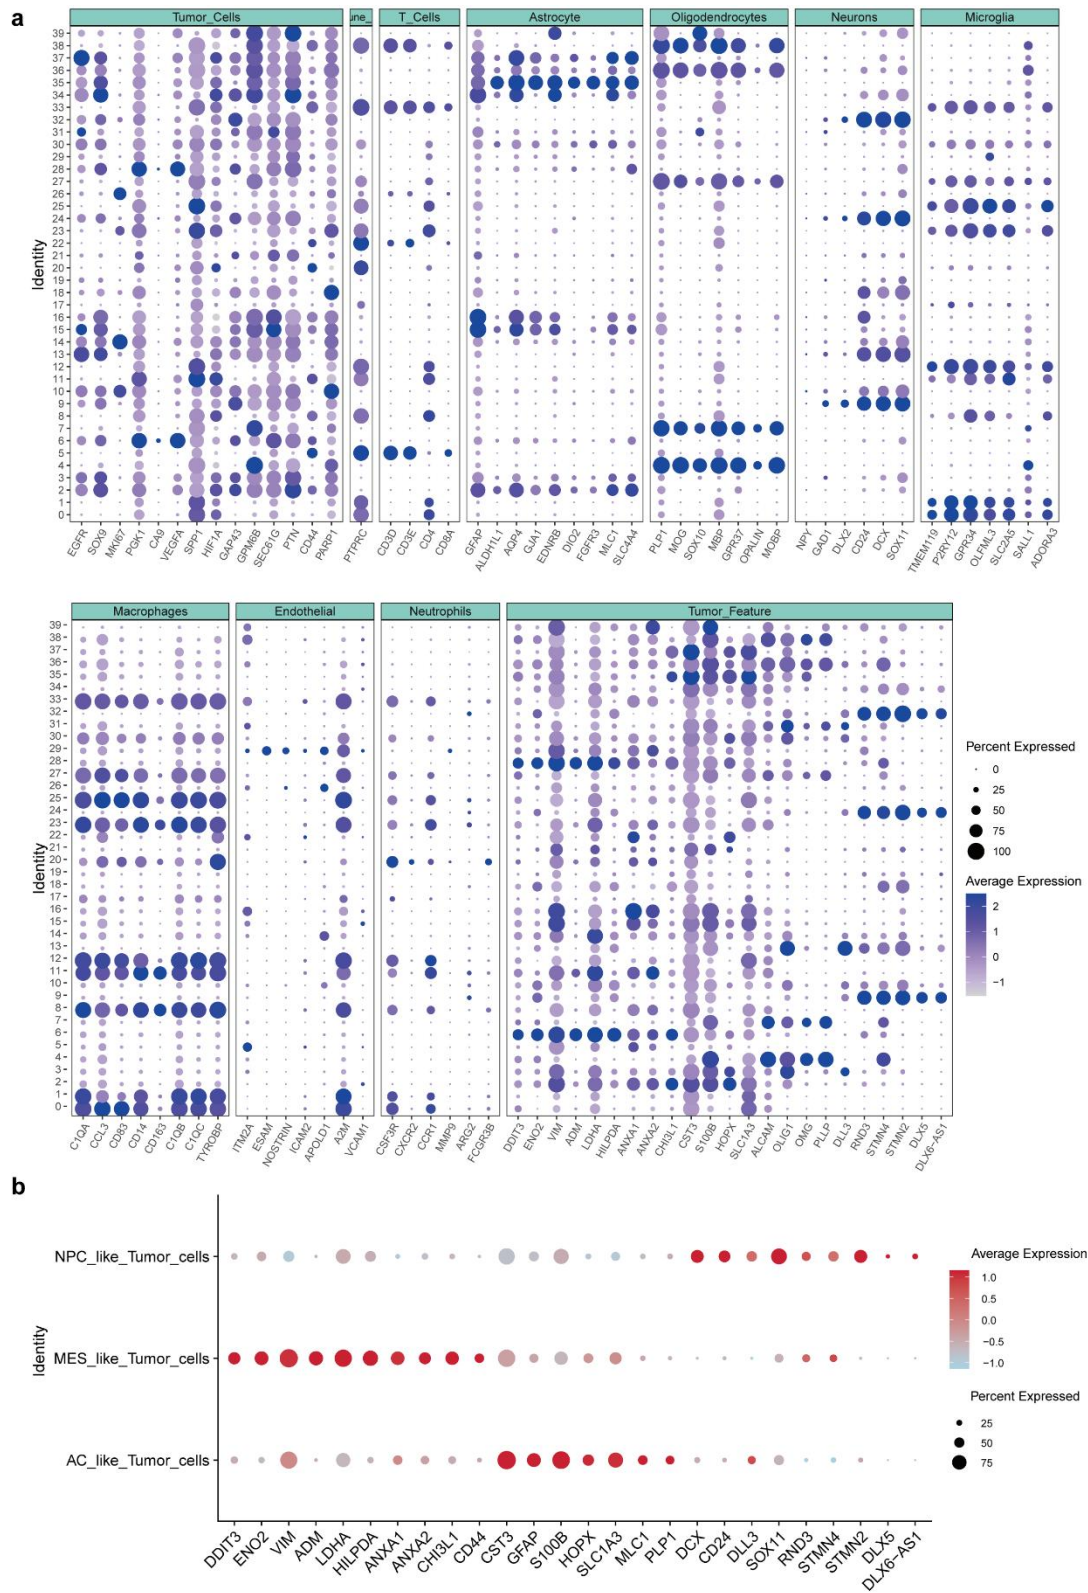

**Supplementary fig 2. The marker genes for identifying cell types. a** Cell type marker gene bubble plot. **b** The marker genes for identifying tumor cells. Source data are provided as a Source Data file.

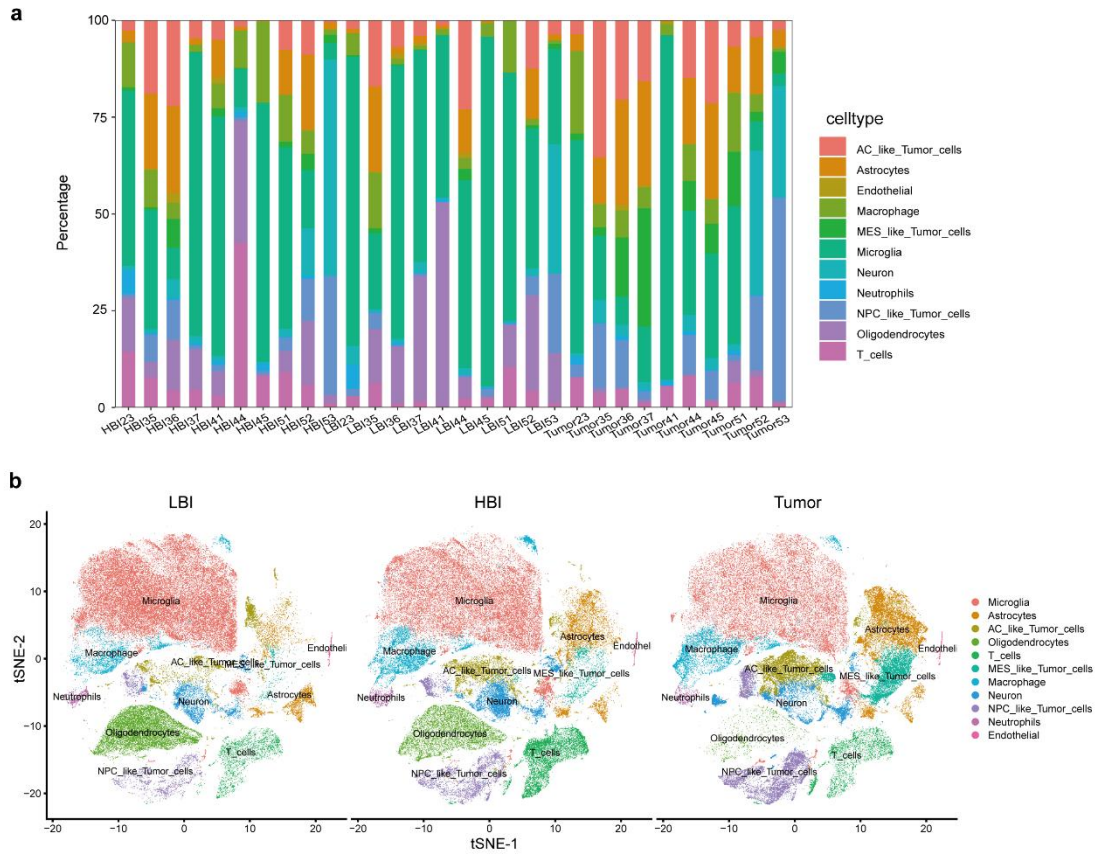

**Supplementary fig 3. The distribution of individual cell types in each sample and tSNE plots.** **a** The proportions of individual cell types in each sample. **b** tSNE plots of 3 regions based on annotated cell types (LBI: 68,326 cells, HBI: 68,521 cells, Tumor: 72,915 cells) ( $n = 10/\text{group}$ , tissue samples from 10 independent subjects). Source data are provided as a Source Data file.



times independently with similar results). **d** Quantitative analysis of relative expression of MMP9 protein (Data are presented as mean  $\pm$  s.e.m.), (n = 7 biological repeats with three technical replicates per biological repeat). **e** The different cell types hypoxia scores (single cell as a unit in the Box plots, total 209,762 cell, the detail samples size could be available from Source Data file). **f** The hypoxia scores of different cell types from 3 regions (single cell as a unit in the Box plots, total 209,762 cell, the detail samples size could be available from Source Data file). Statistical analysis is performed using two-tailed Student's t-test in (a, d); ns=no significance. Box plots in (e, f) represent the median (center line), the 25th and 75th percentiles (bounds of the box). Source data are provided as a Source Data file.

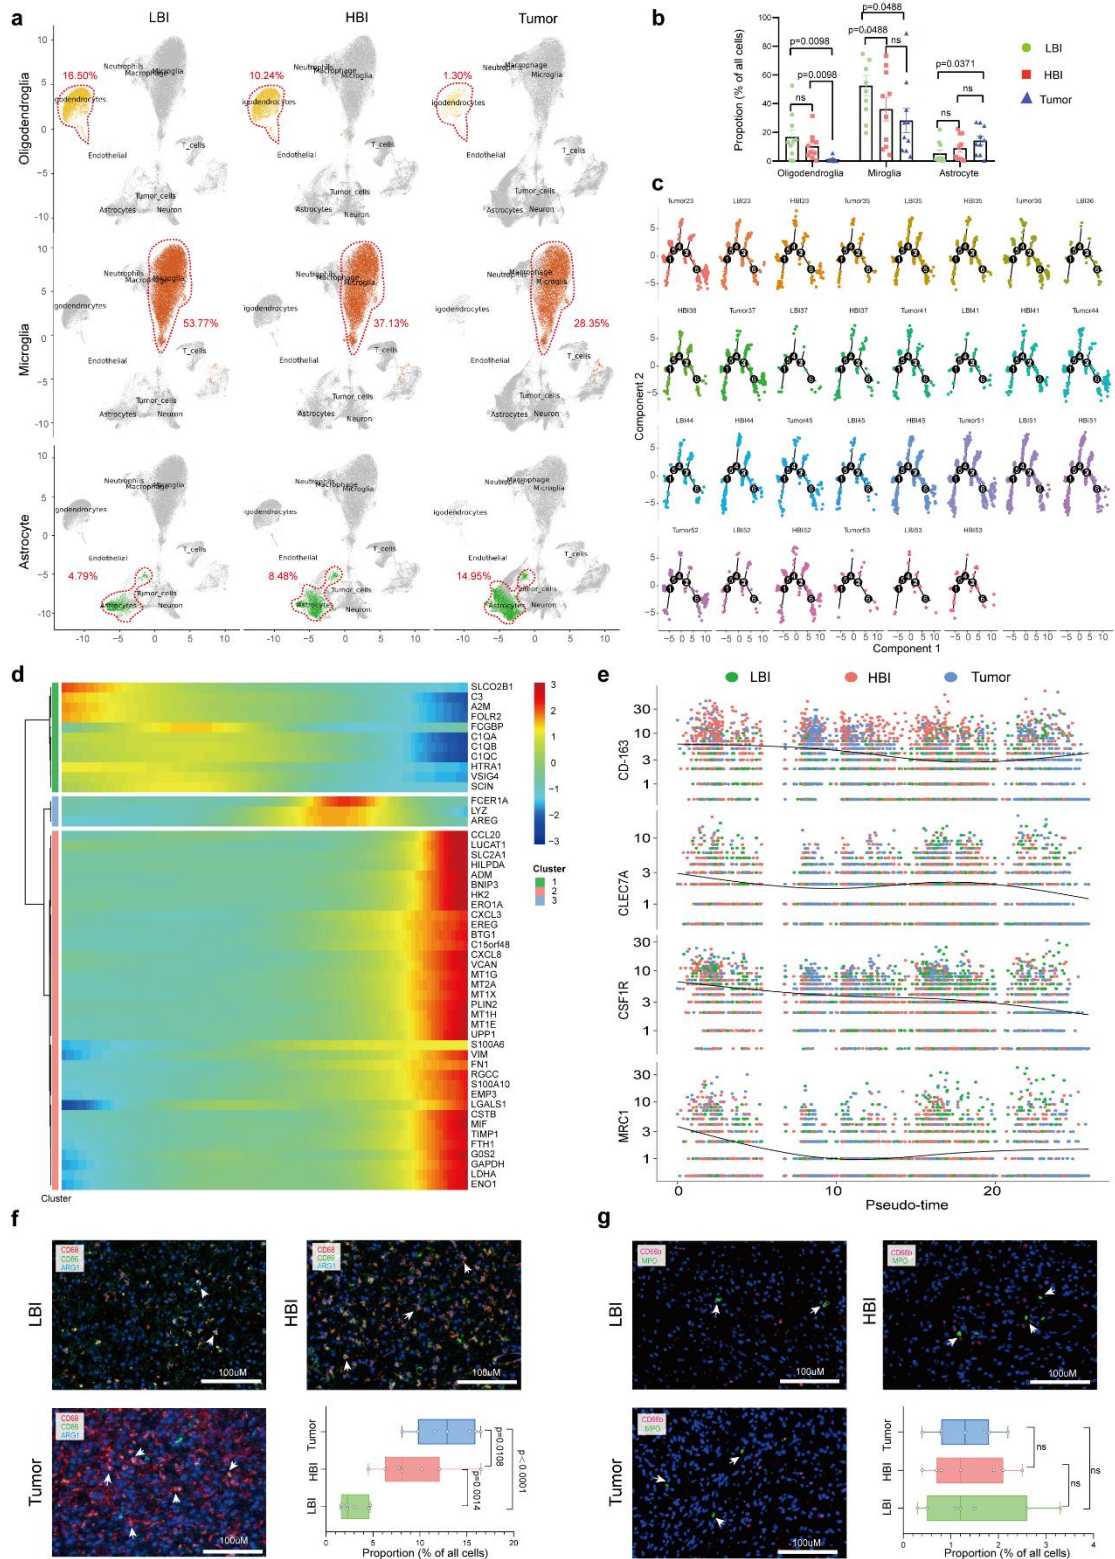

**Supplementary fig 5. Analysis of immune microenvironment signature in 3 regions.** **a, b** The proportion and quantitative analysis of glial cell in different regions based on single cell data (LBI: 68,326 cells, HBI: 68,521 cells, Tumor: 72,915 cells) ( $n = 10/\text{group}$ , tissue samples from 10 subjects) (Data are presented as mean  $\pm$



s.e.m.). **c** Pseudo-time trajectory of macrophages in each sample, respectively (total 13,761 cells; n=3,077 cells in LBI, n= 5,498 cells in HBI, n=5,186 cells in Tumor). **d** Heat map shows the expression of top 50 genes across pseudo-time in three clusters. **e** The expression transition of four M2 signature-genes (*CD163*, *MRC1/CD206*, *CSF1R*, *CLEC7A*) along the pseudo-time of macrophages in 3 regions (n= 13,761 cells). **f, g** Multicolor IHC staining and statistical analysis of anti-inflammatory macrophages (f) and activated neutrophils (g) in three regions, ( n = 7 biological repeats with three technical replicates per biological repeat) (Scale bar, 100  $\mu$ m). Wilcoxon signed rank test were performed in (b); two-tailed Student's t-test were performed in (f, g); ns=no significance. All box plots show median  $\pm$  25/75 percentiles with whiskers showing minimum and maximum values. Source data are provided as a Source Data file.

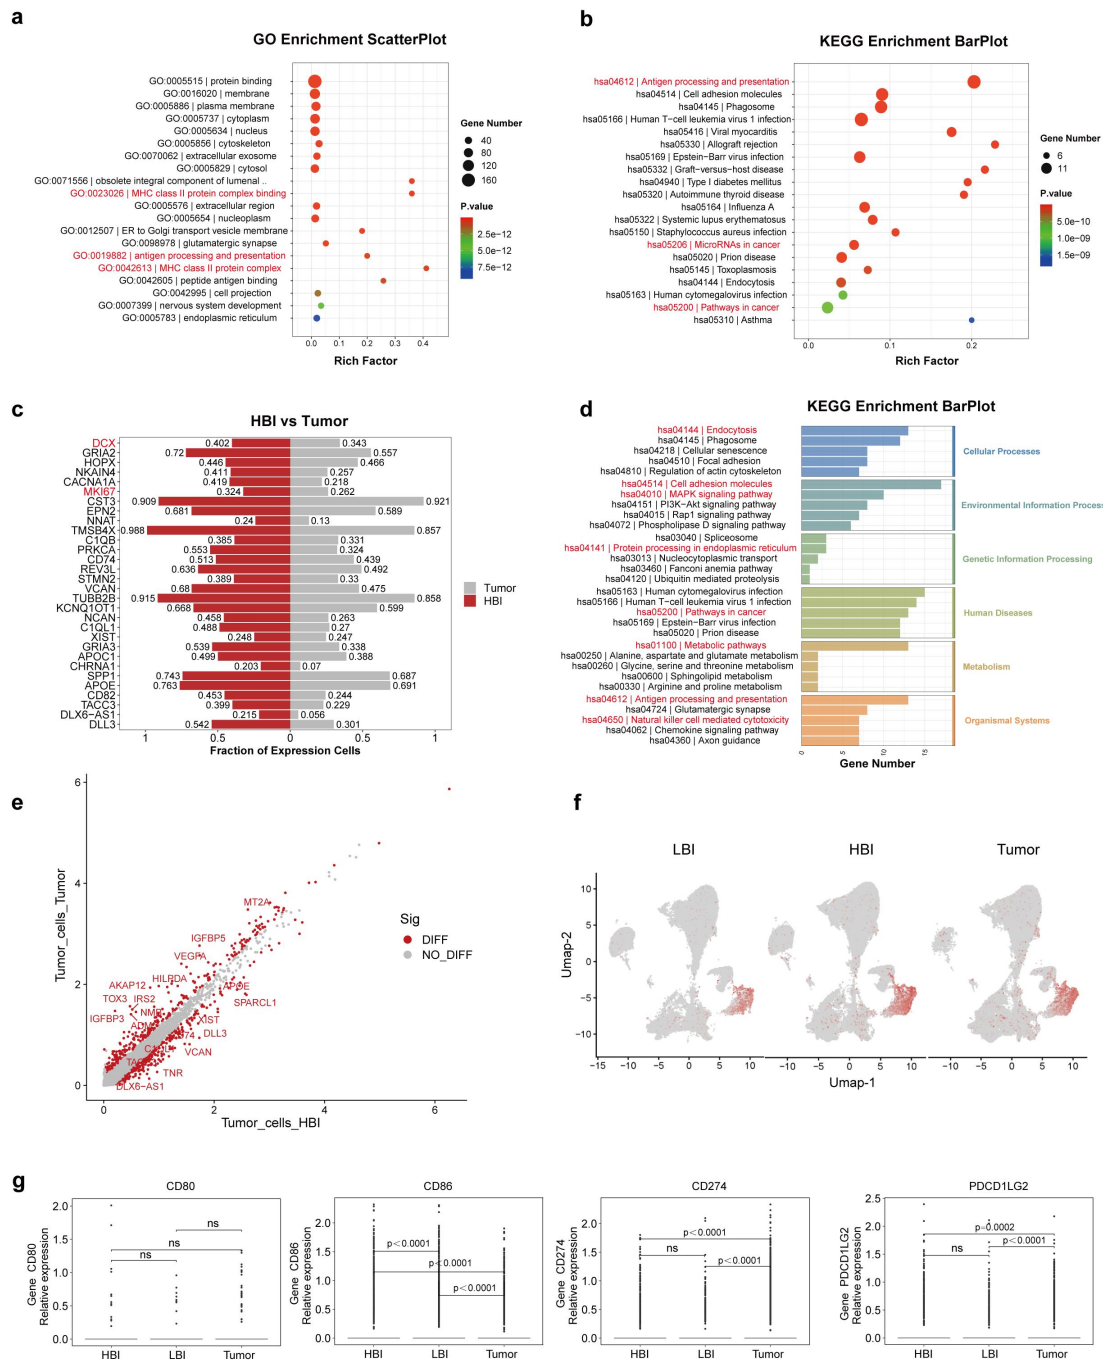

**Supplementary fig 6. The characteristics and distribution of tumor-cells in different regions.** **a** GO Enriched scatterplot of differentially expressed genes of neoplastic cells (HBI vs. LBI). **b** KEGG Enriched scatterplot of differentially expressed genes of neoplastic cells (HBI vs. LBI). **c** Differentially expressed genes between neoplastic cells originating from the HBI or Tumor. **d** Enriched KEGG pathways of differentially expressed genes of neoplastic cells (HBI vs. Tumor). **e** Scatter plots of differentially expressed genes of neoplastic cells (HBI vs. Tumor). **f**

uMAP feature plots showing the expression of Ki67 (LBI: 68,326 cells, HBI: 68,521 cells, Tumor: 72,915 cells) (n = 10/group, tissue samples from 10 subjects). **g** Expression of genes coding for ligands of PD1 (*CD274* and *PDCD1LG2*) and CTLA4 (*CD80* and *CD86*) in 3 regions (Single cell as a unit; total 42,863 neoplastic cells in each Box plots; n=7,434 cells in LBI, n= 10,835 cells in HBI, n=24,594 cells in Tumor). Analysis in (a, b, d) was performed using a hypergeometric distribution test; the bimod statistical test was used in (e); Statistical analysis is performed using Wilcoxon signed rank test in (g), ns=no significance. Source data are provided as a Source Data file.

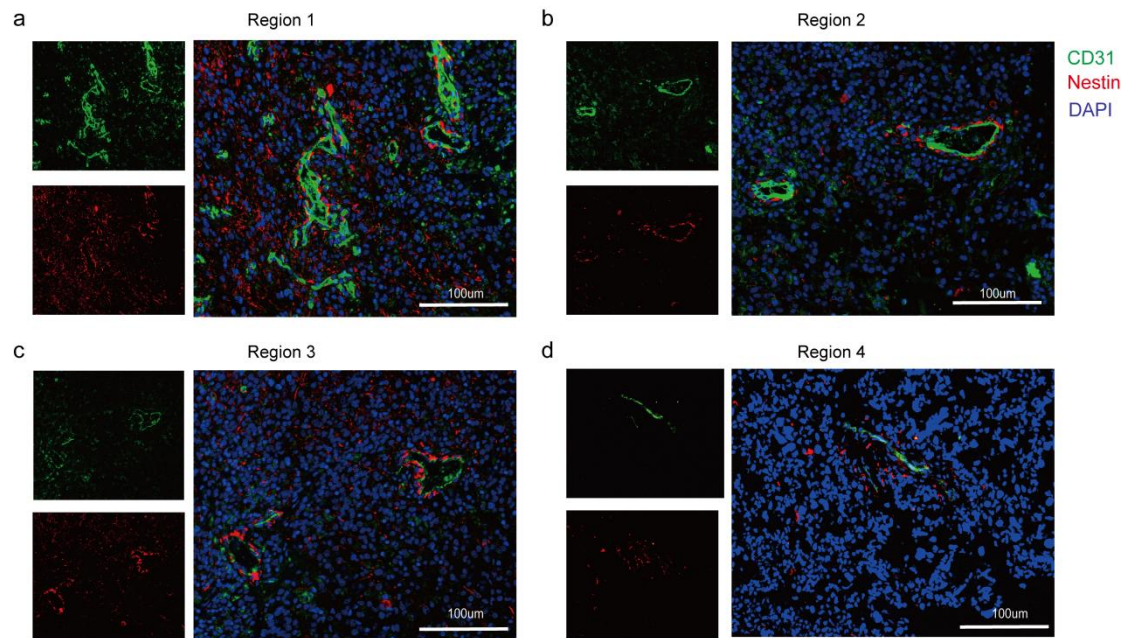

**Supplementary fig 7. Multicolor IHC staining images of that Glioma stem-like cells (GSCs) reside within the perivascular niche. a** Representative images of GSCs and microvasculature in region 1(a), region 2(b), region 3(c) and region 4(d) (Scale bar, 100 μm) (This experiment was repeated 7 biological times independently with similar results).



**Supplementary Table 1. Clinical cohort and metadata**

| ID | Sex | Age | Location                    | Primary or Recurrence | IDH status | EGFR     | MGMT     | ATRX     | Ki67 | P53      | S-100    |
|----|-----|-----|-----------------------------|-----------------------|------------|----------|----------|----------|------|----------|----------|
| 1  | F   | 45  | Left temporal               | Primary               | WT         | NT       | NT       | NT       | 80%  | Positive | Negative |
| 2  | F   | 47  | Right frontal               | Recurrence            | WT         | NT       | NT       | NT       | 50%  | 90%      | Positive |
| 3  | M   | 52  | Right insula                | Primary               | WT         | Positive | NM       | Positive | 20%  | WT       | Positive |
| 4  | F   | 75  | Right parietal              | Primary               | WT         | Positive | Positive | Positive | 15%  | 90%      | Positive |
| 5  | F   | 67  | Right temporal              | Primary               | WT         | NT       | NT       | NT       | 30%  | NT       | Positive |
| 6  | F   | 72  | Left insula                 | Primary               | WT         | Positive | Positive | Positive | 60%  | 60%      | Positive |
| 7  | M   | 57  | Left frontal                | Primary               | WT         | Positive | Positive | Positive | 35%  | Positive | Negative |
| 8  | M   | 25  | Left occipital              | Primary               | WT         | NT       | NT       | Negative | 10%  | Positive | Positive |
| 9  | F   | 45  | Right temporal              | Recurrence            | WT         | NT       | NT       | Positive | 40%  | 5%       | Positive |
| 10 | M   | 48  | Right temporal              | Primary               | WT         | NT       | NT       | Positive | 60%  | 90%      | Positive |
| 11 | M   | 68  | Right temporal              | Primary               | WT         | Positive | NM       | Positive | 30%  | 10%      | Positive |
| 12 | M   | 43  | Right insula                | Primary               | WT         | Positive | NM       | Positive | 3%   | 20%      | Positive |
| 13 | M   | 67  | Left occipital              | Primary               | WT         | Positive | NT       | Positive | 60%  | 60%      | Positive |
| 14 | M   | 70  | Left frontal                | Primary               | WT         | NT       | Positive | Positive | 30%  | NT       | Negative |
| 15 | M   | 54  | Left frontal                | Primary               | WT         | Positive | NM       | Positive | 5%   | Positive | Positive |
| 16 | F   | 56  | Right frontal               | Primary               | WT         | Positive | Positive | Positive | 25%  | 10%      | Negative |
| 17 | M   | 60  | Right frontal and parietal  | Primary               | WT         | Positive | NM       | Positive | 15%  | 20%      | Positive |
| 18 | F   | 74  | Right temporal and parietal | Recurrence            | WT         | Positive | NM       | NT       | 50%  | Positive | Positive |
| 19 | M   | 69  | Left temporal and occipital | Primary               | WT         | Positive | NM       | NT       | 10%  | Positive | Negative |
| 20 | F   | 73  | Left frontal                | Primary               | WT         | Positive | NM       | Negative | 7%   | Positive | Positive |
| 21 | M   | 56  | Right temporal              | Primary               | WT         | Positive | Positive | Positive | 25%  | Positive | Positive |
| 22 | M   | 52  | Right temporal and insula   | Primary               | WT         | Positive | Positive | Positive | 80%  | Positive | Positive |
| 23 | M   | 54  | Left temporal               | Primary               | WT         | Positive | Positive | Positive | 30%  | 30%      | Positive |
| 24 | F   | 64  | Left temporal and parietal  | Primary               | WT         | Positive | Positive | Negative | 40%  | Positive | Positive |
| 25 | M   | 45  | Right frontal temporal      | Recurrence            | WT         | Positive | NM       | Negative | 50%  | WT       | Positive |
| 26 | M   | 32  | Left frontal                | Primary               | WT         | Positive | Positive | Positive | 60%  | Positive | Positive |

Abbreviation: F = Female; M = Male; WT = Wildtype; NM = Non methylated; NT = Not tested.

**Supplementary Table 2.** The volume of different regions

| No.                | Volume (cm <sup>3</sup> ) |                    |                  |                  |                  | Proportion (%) |             |
|--------------------|---------------------------|--------------------|------------------|------------------|------------------|----------------|-------------|
|                    | Volume1<br>(PBZ + Tumor)  | Volume2<br>(Tumor) | Volume3<br>(HBI) | Volume4<br>(PBZ) | Volume5<br>(LBI) | HBI / PBZ      | HBI / Tumor |
| 1                  | 81.75                     | 52.14              | 2.96             | 29.61            | 26.65            | 10.00          | 5.68        |
| 2                  | 60.73                     | 42.55              | 3.45             | 18.18            | 14.73            | 18.98          | 8.11        |
| 3                  | 48.75                     | 31.04              | 0.68             | 17.71            | 17.03            | 3.84           | 2.19        |
| 4                  | 90.81                     | 67.63              | 1.74             | 23.18            | 21.44            | 7.51           | 2.57        |
| 5                  | 47.04                     | 28.21              | 0.52             | 18.83            | 18.31            | 2.76           | 1.84        |
| 6                  | 130.78                    | 87.24              | 0.65             | 43.54            | 42.89            | 1.49           | 0.75        |
| 7                  | 72.62                     | 46.54              | 1.32             | 26.08            | 24.76            | 5.06           | 2.84        |
| 8                  | 35.43                     | 19.56              | 0.58             | 15.87            | 15.29            | 3.65           | 2.97        |
| 9                  | 68.32                     | 23.64              | 1.52             | 44.68            | 43.16            | 3.40           | 6.43        |
| 10                 | 43.77                     | 28.79              | 0.85             | 14.98            | 14.13            | 5.67           | 2.95        |
| 11                 | 53.4                      | 38.66              | 0.62             | 14.74            | 14.12            | 4.21           | 1.60        |
| 12                 | 76.28                     | 53.23              | 0.81             | 23.05            | 22.24            | 3.51           | 1.52        |
| 13                 | 89.38                     | 57.91              | 1.77             | 31.47            | 29.7             | 5.62           | 3.06        |
| 14                 | 71.48                     | 47.83              | 2.45             | 23.65            | 21.2             | 10.36          | 5.12        |
| 15                 | 74.82                     | 46.83              | 1.43             | 27.99            | 26.56            | 5.11           | 3.05        |
| 16                 | 28.93                     | 15.33              | 0.63             | 13.6             | 12.97            | 4.63           | 4.11        |
| 17                 | 103.2                     | 72.31              | 4.76             | 30.89            | 26.13            | 15.41          | 6.58        |
| 18                 | 58.17                     | 37.65              | 1.74             | 20.52            | 18.78            | 8.48           | 4.62        |
| 19                 | 65.39                     | 41.76              | 0.59             | 23.63            | 23.04            | 2.50           | 1.41        |
| 20                 | 80.49                     | 55.76              | 3.5              | 24.73            | 21.23            | 14.15          | 6.28        |
| 21                 | 36.71                     | 23.57              | 0.43             | 13.14            | 12.71            | 3.27           | 1.82        |
| 22                 | 79.24                     | 48.23              | 1.79             | 31.01            | 29.22            | 5.77           | 3.71        |
| 23                 | 87.64                     | 65.75              | 2.53             | 21.89            | 19.36            | 11.56          | 3.85        |
| 24                 | 92.43                     | 67.85              | 3.25             | 24.58            | 21.33            | 13.22          | 4.79        |
| 25                 | 49.38                     | 36.5               | 0.94             | 12.88            | 11.94            | 7.30           | 2.58        |
| 26                 | 76.89                     | 45.67              | 2.13             | 31.22            | 29.09            | 6.82           | 4.66        |
| Average value      | 57.42                     | 45.47              | 1.68             | 23.91            | 22.23            | 7.09           | 3.66        |
| Standard deviation | 22.76                     | 17.30              | 1.13             | 8.25             | 7.99             | 4.39           | 1.84        |

Abbreviation: PBZ = peritumoral brain zone; LBI = lower cerebral blood flow interfaces; HBI = higher cerebral blood flow interface.

**Supplementary Table 3.** The CBF value in different regions

| No. | ROI (mm2) |       |       | Value of CBF (Mean) |        |       |
|-----|-----------|-------|-------|---------------------|--------|-------|
|     | LBI       | HBI   | Tumor | LBI                 | HBI    | Tumor |
| 1   | 21.81     | 24.74 | 21.65 | 22.82               | 27.43  | 11.71 |
| 2   | 21.8      | 19.82 | 23.12 | 45                  | 57     | 28.71 |
| 3   | 21.21     | 21.45 | 18.18 | 59.29               | 62.71  | 88.75 |
| 4   | 22.24     | 20.38 | 21.65 | 80.25               | 111.29 | 67.75 |
| 5   | 22.16     | 24.38 | 19.94 | 5.26                | 18.25  | 7.64  |
| 6   | 20.88     | 18.56 | 15.9  | 5.33                | 49     | 21    |
| 7   | 18.25     | 20.27 | 23.36 | 19.5                | 25.75  | 9.75  |
| 8   | 20.27     | 22.3  | 24.33 | 30.25               | 52     | 21.5  |
| 9   | 24.33     | 20.07 | 20.28 | 33                  | 101.75 | 19.25 |
| 10  | 19.94     | 22.16 | 24.38 | 20.64               | 45     | 67    |
| 11  | 18.25     | 20.27 | 16.22 | 40.5                | 57.25  | 24.8  |
| 12  | 20.28     | 22.3  | 19.46 | 49.75               | 71.5   | 27.62 |
| 13  | 21.9      | 18.25 | 21.9  | 19.67               | 51.06  | 7.25  |
| 14  | 20.28     | 22.3  | 19.47 | 33.75               | 69.25  | 17.57 |
| 15  | 21.28     | 20.76 | 15.83 | 16                  | 64     | 95    |
| 16  | 15.45     | 20.08 | 18.54 | 27.33               | 35.6   | 26.33 |
| 17  | 20.76     | 20.76 | 20.76 | 8.57                | 51.29  | 31.57 |
| 18  | 21.28     | 21.28 | 17.56 | 16.5                | 35.75  | 59.75 |
| 19  | 19.31     | 23.17 | 21.28 | 17.25               | 50.25  | 45.75 |
| 20  | 18.08     | 21.7  | 21.7  | 21.5                | 35.75  | 91.5  |
| 21  | 19.31     | 19.31 | 19.31 | 39                  | 62.75  | 39.5  |
| 22  | 23.17     | 19.31 | 23.17 | 17.5                | 32.33  | 3.75  |
| 23  | 21.7      | 21.1  | 23.54 | 14                  | 42.2   | 40    |
| 24  | 23.37     | 19.47 | 19.47 | 30                  | 50.75  | 4.25  |
| 25  | 20.87     | 20.87 | 20.87 | 60.29               | 93.5   | 39.25 |
| 26  | 22.37     | 19.47 | 22.37 | 10.25               | 22.25  | 7.25  |

Abbreviation: ROI = region of interest; CBF = cerebral blood flow; LBI = lower cerebral blood flow interfaces; HBI = higher

cerebral blood flow interface.

**Supplementary Table 4.** The information of quality control during sequencing

| Sample  | Estimated Number of Cells | Mean Reads per Cell | Median Genes per Cell | Reads Mapped to Genome | Reads Mapped Confidently to Genome | Reads Mapped Confidently to Transcriptome | Total Genes Detected | Before filter cell number | After filter cell number |
|---------|---------------------------|---------------------|-----------------------|------------------------|------------------------------------|-------------------------------------------|----------------------|---------------------------|--------------------------|
| HBI23   | 3,564                     | 130,091             | 2,444                 | 96.90%                 | 90.70%                             | 52.30%                                    | 34,242               | 3564                      | 2315                     |
| HBI35   | 5,281                     | 74,990              | 3,265                 | 98.00%                 | 93.80%                             | 58.00%                                    | 36,313               | 5281                      | 4254                     |
| HBI36   | 9,939                     | 39,951              | 3,074                 | 97.80%                 | 93.80%                             | 54.30%                                    | 36,529               | 9939                      | 8099                     |
| HBI37   | 10,824                    | 37,226              | 2,484                 | 97.40%                 | 93.20%                             | 43.00%                                    | 36,423               | 10824                     | 9493                     |
| HBI41   | 9,168                     | 51,884              | 2,786                 | 97.80%                 | 93.20%                             | 55.70%                                    | 37,843               | 9168                      | 7378                     |
| HBI44   | 9,897                     | 41,478              | 2,309                 | 96.20%                 | 91.90%                             | 45.50%                                    | 38,304               | 9897                      | 8378                     |
| HBI45   | 9,082                     | 50,983              | 2,456                 | 96.70%                 | 92.60%                             | 50.50%                                    | 35,008               | 9082                      | 7721                     |
| HBI51   | 10,509                    | 38,734              | 2,957                 | 96.30%                 | 91.40%                             | 43.00%                                    | 39,079               | 10509                     | 9167                     |
| HBI52   | 6,167                     | 63,029              | 3,712                 | 97.40%                 | 92.10%                             | 44.10%                                    | 40,756               | 6167                      | 5257                     |
| HBI53   | 8,923                     | 43,126              | 3,304                 | 95.40%                 | 90.80%                             | 34.80%                                    | 38,787               | 8923                      | 7870                     |
| LBI23   | 8,909                     | 50,140              | 2,464                 | 97.10%                 | 90.30%                             | 51.80%                                    | 35,121               | 8909                      | 6518                     |
| LBI35   | 6,178                     | 60,536              | 3,305                 | 98.10%                 | 93.90%                             | 58.10%                                    | 36,440               | 6178                      | 5143                     |
| LBI36   | 8,272                     | 48,401              | 2,217                 | 97.50%                 | 93.50%                             | 42.40%                                    | 34,825               | 8272                      | 7256                     |
| LBI37   | 7,169                     | 64,610              | 2,667                 | 97.10%                 | 92.30%                             | 39.20%                                    | 36,015               | 7169                      | 6058                     |
| LBI41   | 8,255                     | 49,911              | 2,773                 | 97.10%                 | 93.30%                             | 40.80%                                    | 35,956               | 8255                      | 7363                     |
| LBI44   | 8,315                     | 48,813              | 2,757                 | 94.80%                 | 89.90%                             | 42.10%                                    | 38,702               | 8315                      | 7034                     |
| LBI45   | 9,245                     | 49,459              | 2,372                 | 96.30%                 | 91.90%                             | 47.60%                                    | 33,804               | 9245                      | 7917                     |
| LBI51   | 9,500                     | 38,941              | 2,745                 | 95.90%                 | 90.80%                             | 41.90%                                    | 37,132               | 9500                      | 8184                     |
| LBI52   | 7,703                     | 50,778              | 3,437                 | 97.10%                 | 92.60%                             | 39.50%                                    | 40,251               | 7703                      | 6791                     |
| LBI53   | 8,823                     | 44,636              | 3,351                 | 96.00%                 | 91.00%                             | 37.90%                                    | 39,301               | 8823                      | 7736                     |
| Tumor23 | 4,754                     | 97,430              | 3,118                 | 97.60%                 | 91.10%                             | 59.10%                                    | 33,326               | 4754                      | 2936                     |
| Tumor35 | 5,236                     | 76,563              | 4,106                 | 98.00%                 | 93.20%                             | 54.50%                                    | 36,491               | 5236                      | 4268                     |



|         |        |        |       |        |        |        |        |       |       |
|---------|--------|--------|-------|--------|--------|--------|--------|-------|-------|
| Tumor36 | 7,730  | 64,701 | 3,730 | 97.80% | 93.60% | 57.40% | 36,502 | 7730  | 5917  |
| Tumor37 | 15,473 | 28,060 | 2,981 | 97.70% | 93.40% | 62.90% | 37,077 | 15473 | 12484 |
| Tumor41 | 10,724 | 36,975 | 2,038 | 97.60% | 93.40% | 42.20% | 34,250 | 10724 | 9380  |
| Tumor44 | 7,337  | 55,776 | 3,570 | 96.20% | 91.50% | 48.30% | 38,255 | 7337  | 6137  |
| Tumor45 | 8,414  | 57,165 | 3,416 | 97.10% | 92.80% | 53.10% | 36,861 | 8414  | 6327  |
| Tumor51 | 12,181 | 35,382 | 2,891 | 96.60% | 91.40% | 46.40% | 39,815 | 12181 | 10465 |
| Tumor52 | 9,227  | 42,688 | 3,419 | 96.40% | 89.60% | 35.80% | 40,682 | 9227  | 8185  |
| Tumor53 | 8,635  | 47,805 | 3,609 | 95.40% | 89.90% | 38.20% | 39,406 | 8635  | 7529  |

---

Abbreviation: LBI = lower cerebral blood flow interfaces; HBI = higher cerebral blood flow interface.

**Supplementary Table 5. The antibody used in study**

| Antibody                          | Species reactivity | Host species | Supplier    | Cat No.     | Dilution ratio |
|-----------------------------------|--------------------|--------------|-------------|-------------|----------------|
| IHC                               |                    |              |             |             |                |
| CD31                              | Human              | Mouse        | Abcam       | ab9498      | 1/500          |
| VEGFA                             | Human              | Rabbit       | Wanleibio   | WL00009b    | 1/200          |
| EGFR                              | Human              | Rabbit       | Wanleibio   | WL0682a     | 1/200          |
| HIF-1 $\alpha$                    | Human              | Rabbit       | proteintech | 20960-1-AP  | 1/500          |
| MMP-9                             | Human              | Rabbit       | proteintech | 10375-2-AP  | 1/500          |
| Ki-67                             | Human              | Rabbit       | proteintech | 27309-1-AP  | 1/2000         |
| Goat Anti-Rabbit<br>IgG H&L (HRP) | Rabbit             | Goat         | Abcam       | ab6721      | 1/500          |
| Goat Anti-Mouse<br>IgG H&L (HRP)  | Mouse              | Goat         | Abcam       | ab6789      | 1/500          |
| Western blot                      |                    |              |             |             |                |
| VEGFA                             | Human              | Rabbit       | Wanleibio   | WL00009b    | 1/1000         |
| EGFR                              | Human              | Rabbit       | Wanleibio   | WL0682a     | 1/1000         |
| HIF-1 $\alpha$                    | Human              | Rabbit       | proteintech | 20960-1-AP  | 1/2000         |
| MMP-9                             | Human              | Rabbit       | proteintech | 10375-2-AP  | 1/1000         |
| $\beta$ -actin                    | Human              | Mouse        | Beyotime    | AF0003      | 1/1000         |
| Goat Anti-Rabbit<br>IgG H&L (HRP) | Rabbit             | Goat         | Abcam       | ab6721      | 1/5000         |
| Goat Anti-Mouse<br>IgG H&L (HRP)  | Mouse              | Goat         | Abcam       | ab6789      | 1/3000         |
| IF                                |                    |              |             |             |                |
| Nestin                            | Human              | Mouse        | Abcam       | ab18102     | 1/400          |
| CD31                              | Human              | Rabbit       | proteintech | 11265-1-AP  | 1/200          |
| CD86                              | Human              | Rabbit       | CST         | 91882S      | 1/200          |
| Arginase-1                        | Human              | Rabbit       | CST         | 93668T      | 1/200          |
| CD66b                             | Human              | Rabbit       | Affinity    | DF10151     | 1/100          |
| MPO                               | Human              | Rabbit       | proteintech | 22225-1-AP  | 1/300          |
| OLIG2                             | Human              | Rabbit       | Abcam       | ab109186    | 1/800          |
| SOX2                              | Human              | Rabbit       | Abcam       | ab92494     | 1/100          |
| CD68                              | Human              | Rabbit       | proteintech | 25747-1-AP  | 1/1000         |
| CD3                               | Human              | Rabbit       | proteintech | 17617-1-AP  | 1/1000         |
| SOX9                              | Human              | Rabbit       | Servicebio  | GB14171-50  | 1/200          |
| GFAP                              | Human              | Rabbit       | Servicebio  | GB11096-100 | 1/1000         |
| TMEM119                           | Human              | Rabbit       | Abcam       | ab306583    | 1/1000         |
| iF440-Tyramide                    | -                  | -            | Servicebio  | G1250       | 1/500          |
| iF488-Tyramide                    | -                  | -            | Servicebio  | G1231       | 1/500          |
| iF555-Tyramide                    | -                  | -            | Servicebio  | G1233       | 1/500          |
| iF594-Tyramide                    | -                  | -            | Servicebio  | G1242       | 1/500          |
| iF647-Tyramide                    | -                  | -            | Servicebio  | G1232       | 1/500          |

Abbreviation: IHC = immunohistochemistry; IF =Immunofluorescence.
