# Supplementary material for: Turning attention to tumor–host interface and focus on the peritumoral heterogeneity of glioblastoma
Source: PubMed Central journal article supplement — Nat Commun. 2024 Dec 30;15:10885. doi: 10.1038/s41467-024-55243-5 (PMC11685534; doi:10.1038/s41467-024-55243-5), 2024-12-30
Supplement: 41467_2024_55243_MOESM2_ESM.pdf [file 41467_2024_55243_MOESM2_ESM.pdf]

## Reporting Summary

Nature Portfolio wishes to improve the reproducibility of the work that we publish. This form provides structure for consistency and transparency in reporting. For further information on Nature Portfolio policies, see our [Editorial Policies](#) and the [Editorial Policy Checklist](#).

### Statistics

For all statistical analyses, confirm that the following items are present in the figure legend, table legend, main text, or Methods section.

n/a | Confirmed

- The exact sample size ( $n$ ) for each experimental group/condition, given as a discrete number and unit of measurement
- A statement on whether measurements were taken from distinct samples or whether the same sample was measured repeatedly
- The statistical test(s) used AND whether they are one- or two-sided  
*Only common tests should be described solely by name; describe more complex techniques in the Methods section.*
- A description of all covariates tested
- A description of any assumptions or corrections, such as tests of normality and adjustment for multiple comparisons
- A full description of the statistical parameters including central tendency (e.g. means) or other basic estimates (e.g. regression coefficient) AND variation (e.g. standard deviation) or associated estimates of uncertainty (e.g. confidence intervals)
- For null hypothesis testing, the test statistic (e.g.  $F$ ,  $t$ ,  $r$ ) with confidence intervals, effect sizes, degrees of freedom and  $P$  value noted  
*Give  $P$  values as exact values whenever suitable.*
- For Bayesian analysis, information on the choice of priors and Markov chain Monte Carlo settings
- For hierarchical and complex designs, identification of the appropriate level for tests and full reporting of outcomes
- Estimates of effect sizes (e.g. Cohen's  $d$ , Pearson's  $r$ ), indicating how they were calculated

*Our web collection on [statistics for biologists](#) contains articles on many of the points above.*

### Software and code

Policy information about [availability of computer code](#)

Data collection

The original MR images were transferred to a workstation (GE Advantage Workstation 4.9). The raw ASL image data were imported to a GE workstation (ADW4.7) to generate CBF maps.

Single-cell suspensions were loaded onto 10x Chromium to capture single cells. The subsequent cDNA amplification and library construction steps were performed according to standard protocols. Libraries were sequenced on an Illumina NovaSeq 6000 sequencing system (paired-end multiplexing run, 150 bp).

The images of immunohistochemistry were detected using an Olympus BX41 microscope.

The images of Immunofluorescence were taken using a Leica fluorescence microscope (DN4000B, Leica Microsystems, Germany).

Data analysis

Quantitative analysis of immunohistochemistry and Blotting band were calculated using the IHC toolbox plugin (IHC Profiler) of Image J Software (Vesion1.48, National Institutes of Health, Image J system, Bethesda, MD, USA).

The sequencing results were demultiplexed and converted to FASTQ format using Illumina bcl2fastq software.

Sample demultiplexing, barcode processing and single-cell 3' gene counting were performed by using the Cell Ranger pipeline (<https://support.10xgenomics.com/single-cell-geneexpression/software/pipelines/latest/what-is-cell-ranger>, version 3.1.0).

The Cell Ranger output was loaded into Seurat (version 3.1.1) for dimensional reduction, clustering, and analysis of the scRNA-seq data. When

applying quality control, we set the criteria as min gene > 500 and proportion of mitochondria < 25% following doublet filtering via the R package 'DoubletFinder'(v2.0.3).

The cells were normalized to the total unique molecular identifier read count as instructed in the manufacturer's manual (<http://satijalab.org/seurat/>).

We used the Find Neighbors and Find Clusters functions in the Seurat package for cell clustering analysis and displayed the 2D map via tSNE/Umap.

The expression of selected genes was plotted with the Seurat function FeaturePlot and VlnPlot.

Heatmaps were generated via the heatmap function in Seurat.

An advanced single-cell volcano plot was generated via the OmicStudio tools at <https://www.omicstudio.cn/tool>.

Single-cell trajectory analysis was performed via the OmicStudio tools at <https://www.omicstudio.cn/analysis/tenXMonocle>.

CellPhoneDB Python package was using to conduct Cell-Cell interaction and Cellular communication analysis.

The GO analysis was performed based on the Database of Annotation, Visualization and Integrated Discovery (DAVID, <https://david.ncifcrf.gov/>). The KEGG pathway analysis was conducted the same way as the GO analysis.

Statistical analyses were performed on GraphPad Prism Software (v 8.0.1, GraphPad Software, San Diego, CA, USA) and SPSS statistics software (v21.0, Chicago, USA).

For manuscripts utilizing custom algorithms or software that are central to the research but not yet described in published literature, software must be made available to editors and reviewers. We strongly encourage code deposition in a community repository (e.g. GitHub). See the Nature Portfolio [guidelines for submitting code & software](#) for further information.

## Data

Policy information about [availability of data](#)

All manuscripts must include a [data availability statement](#). This statement should provide the following information, where applicable:

- Accession codes, unique identifiers, or web links for publicly available datasets
- A description of any restrictions on data availability
- For clinical datasets or third party data, please ensure that the statement adheres to our [policy](#)

The raw data of scRNA-seq generated in this study have been deposited in the Genome Sequence Archive (Genomics, Proteomics & Bioinformatics 2021) in National Genomics Data Center (Nucleic Acids Res 2022), China National Center for Bioinformation / Beijing Institute of Genomics, Chinese Academy of Sciences (GSA-Human: HRA009021) that are publicly accessible at <https://ngdc.cncb.ac.cn/gsa-human>. All other data included in this study are provided in Supplementary data and Source data. Source data are provided with this paper.

## Research involving human participants, their data, or biological material

Policy information about studies with [human participants or human data](#). See also policy information about [sex, gender \(identity/presentation\), and sexual orientation](#) and [race, ethnicity and racism](#).

### Reporting on sex and gender

The gender of participants in this study has been disclosed in Supplementary Table 1. Sex was determined by self-reporting, and it was not considered for study design. This is because that this study focuses on spatial heterogeneity in tumors and PBZ areas. The study did not involve an analysis of prognostic risk factors for clinical outcomes, and patient clinical characteristics (such as gender, age, course of disease, etc.) were not included in the study design. In addition, the relative few individuals in each group is another reason.

### Reporting on race, ethnicity, or other socially relevant groupings

All human participants were of Han Chinese origin.

### Population characteristics

Demographics of the subjects are summarized in Supplementary table1.

### Recruitment

1.The detailed inclusion criteria( should be met at the same time):  
 (1). The patients who received gross total resection (GTR).  
 (2). Preoperative MRI showed significant T2 FLAIR abnormality area surrounding the contrast-enhancing/CE area.  
 (3). Senior surgeon believe that partial resection of non-CE area beyond the CE tumor borders is beneficial but also harmless to the prognosis of patients.  
 (4).The sampling locations of HBI and LBI, as determined by preoperative ASL-CBF imaging, were located in the non-CE area planned to be excised before surgery.  
 (5)Individuals gave written informed consent for the sample donation.  
 2.The exclusion criteria:  
 (1). Patients who receive only biopsy or partial resection of their tumor will not undergo additional PBZ removal programs.  
 (2). If the PBZ sampling area delineated before surgery is considered dangerous/no beneficial for the patients (such as sampling lesions of PBZ are found in the eloquent area), the patients will not be enrolled in the study and the sampling of PBZ will not be performed.

There was no selection bias, as patients were not grouped in this study.

Ethics oversight

Ethical approval for the study was obtained from the Ethics Committee of the Second Affiliated Hospital of Harbin Medical University (Ethics no. KY2021/172) and the Ethics Committee of Zhejiang Provincial People Hospital (Ethics no. 2021JS043). Ethical principles set out by the Declaration of Helsinki were strictly followed, and written consent was obtained from each patient in this study. The written consent was obtained from each patient in this study.

Note that full information on the approval of the study protocol must also be provided in the manuscript.

## Field-specific reporting

Please select the one below that is the best fit for your research. If you are not sure, read the appropriate sections before making your selection.

Life sciences  Behavioural & social sciences  Ecological, evolutionary & environmental sciences

For a reference copy of the document with all sections, see [nature.com/documents/nr-reporting-summary-flat.pdf](https://www.nature.com/documents/nr-reporting-summary-flat.pdf)

## Life sciences study design

All studies must disclose on these points even when the disclosure is negative.

|                 |                                                                                                                                                                                                                                                                                                                                                                                   |
|-----------------|-----------------------------------------------------------------------------------------------------------------------------------------------------------------------------------------------------------------------------------------------------------------------------------------------------------------------------------------------------------------------------------|
| Sample size     | Sample sizes are indicated in each figure and figure legend. No power analysis or statistical method were used to calculate the sample size, they were determined based on our previous experimental designs and results. Data from all experiments were analyzed and p-values from statistical tests used to assess statistical significant and appropriateness of sample sizes. |
| Data exclusions | This study did not exclude any data from the analysis                                                                                                                                                                                                                                                                                                                             |
| Replication     | All the data in this study are representative of at least three experiments, unless otherwise statements. Experiments were performed independently.                                                                                                                                                                                                                               |
| Randomization   | This is not relevant to this study. In all the experiments carried out in this study, samples were assigned to experimental groups according to the specific anatomical regions from which they derived. The focus of the study was on the differences between these specific regions, so random allocation was not applicable.                                                   |
| Blinding        | The investigators were blinded to group allocation during data collection and analysis                                                                                                                                                                                                                                                                                            |

## Reporting for specific materials, systems and methods

We require information from authors about some types of materials, experimental systems and methods used in many studies. Here, indicate whether each material, system or method listed is relevant to your study. If you are not sure if a list item applies to your research, read the appropriate section before selecting a response.

### Materials & experimental systems

| n/a                                 | Involved in the study                                  |
|-------------------------------------|--------------------------------------------------------|
| <input type="checkbox"/>            | <input checked="" type="checkbox"/> Antibodies         |
| <input checked="" type="checkbox"/> | <input type="checkbox"/> Eukaryotic cell lines         |
| <input checked="" type="checkbox"/> | <input type="checkbox"/> Palaeontology and archaeology |
| <input checked="" type="checkbox"/> | <input type="checkbox"/> Animals and other organisms   |
| <input checked="" type="checkbox"/> | <input type="checkbox"/> Clinical data                 |
| <input checked="" type="checkbox"/> | <input type="checkbox"/> Dual use research of concern  |
| <input checked="" type="checkbox"/> | <input type="checkbox"/> Plants                        |

### Methods

| n/a                                 | Involved in the study                                      |
|-------------------------------------|------------------------------------------------------------|
| <input checked="" type="checkbox"/> | <input type="checkbox"/> ChIP-seq                          |
| <input checked="" type="checkbox"/> | <input type="checkbox"/> Flow cytometry                    |
| <input type="checkbox"/>            | <input checked="" type="checkbox"/> MRI-based neuroimaging |

## Antibodies

Antibodies used

The source and dilution of all antibodies are also summarized in Supplementary table 5.

Antibodies used for IHC:  
 CD31; Abcam; ab9498; 1/500  
 VEGFA; Wanleibio; WL00009b; 1/200  
 EGFR; Wanleibio; WL0682a; 1/200  
 HIF-1 $\alpha$ ; proteintech; 20960-1-AP; 1/500  
 MMP-9; proteintech; 10375-2-AP; 1/500  
 Ki-67; 27309-1-AP;proteintech; 1/2000  
 Goat Anti-Rabbit IgG H&L (HRP); Abcam; ab6721; 1/500  
 Goat Anti-Mouse IgG H&L (HRP); Abcam; ab6789 1/500

Antibodies used for Western blot  
 VEGFA; Wanleibio; WL00009b; 1/1000  
 EGFR; Wanleibio; WL0682a; 1/1000  
 HIF-1 $\alpha$ ; proteintech; 20960-1-AP; 1/2000  
 MMP-9; proteintech; 10375-2-AP; 1/1000  
 $\beta$ -actin; Beyotime; AF0003; 1/1000  
 Goat Anti-Rabbit IgG H&L (HRP); Abcam; ab6721; 1/5000  
 Goat Anti-Mouse IgG H&L (HRP); Abcam; ab6789 1/3000

Antibodies used for IF  
 Nestin; Abcam; ab18102; 1/400  
 CD31; proteintech; 11265-1-AP; 1/200  
 CD86; CST; 91882S; 1/200  
 Arginase-1; CST; 93668T; 1/200  
 CD66b; Affinity; DF10151; 1/100  
 MPO; proteintech; 22225-1-AP; 1/300  
 OLIG2; Abcam; ab109186; 1/800  
 SOX2; Abcam; ab92494; 1/100  
 CD68; proteintech; 25747-1-AP; 1/1000  
 CD3; proteintech; 17617-1-AP; 1/1000  
 SOX9; Servicebio; GB14171-50; 1/200  
 GFAP; Servicebio; GB11096-100; 1/1000  
 TMEM119; Abcam; ab306583; 1/1000  
 iF440-Tyramide ; Servicebio ; G1250 ; 1/500  
 iF488-Tyramide ; Servicebio ; G1231 ; 1/500  
 iF555-Tyramide ; Servicebio ; G1233 ; 1/500  
 iF594-Tyramide ; Servicebio ; G1242 ; 1/500  
 iF647-Tyramide ; Servicebio ; G1232 ; 1/500

## Validation

All primary antibodies were validated for the species (mouse) and application (immunohistochemistry, immunofluorescence, western blot) by the correspondent manufacturers or previous publications from Citeab (<https://www.citeab.com>); All antibodies were individually tested and titrated on relevant positive and negative biological controls prior to use.

Anti-CD31 ; Abcam; ab9498  
 Vendor information:<https://www.abcam.cn/cd31-antibody-jc70a-ab9498.html>

Anti-VEGFA ; Wanleibio ; WL00009b  
 Vendor information:<https://www.wanleibio.cn/index/ProList?keywords=WL00009b>

Anti-EGFR; Wanleibio; WL0682a  
 Vendor information:<https://www.wanleibio.cn/index/ProList?keywords=WL0682a>

Anti-HIF-1 $\alpha$  ; proteintech ; 20960-1-AP  
 Vendor information:<https://www.ptgcn.com/products/HIF1A-Antibody-20960-1-AP.htm>

Anti-MMP-9 ; proteintech ; 10375-2-AP  
 Vendor information:<https://www.ptgcn.com/products/MMP9-Antibody-10375-2-AP.htm>

Anti-Ki-67 ; proteintech; 27309-1-AP  
 Vendor information:<https://www.ptgcn.com/products/KI67-Antibody-27309-1-AP.htm>

Goat Anti-Rabbit IgG H&L (HRP) Rabbit Goat ;Abcam; ab6721  
 Vendor information:<https://www.abcam.cn/goat-rabbit-igg-hl-hrp-ab6721.html>

Goat Anti-Mouse IgG H&L (HRP) Mouse Goat; Abcam ;ab6789  
 Vendor information:<https://www.abcam.cn/goat-mouse-igg-hl-hrp-ab6789.html>

Anti- $\beta$ -actin Human Mouse; Beyotime ;AF0003  
 Vendor information:<https://www.beyotime.com/product/AF0003.htm>

Anti-Nestin ; Abcam; ab18102  
 Vendor information:<https://www.abcam.cn/nestin-antibody-2c13a11-ab18102.html>

CD86 (E2G8P) Rabbit mAb; CST; 91882S  
 Vendor information: <https://www.cellsignal.cn/products/primary-antibodies/cd86-e2g8p-rabbit-mab/91882>

Arginase-1 ;CST;93668T  
 Vendor information: <https://www.cellsignal.cn/products/primary-antibodies/arginase-1-d4e3m-xp-rabbit-mab/93668>

AAnti-CD66b; Affinity ;DF10151

Vendor information: [http://www.affbiotech.cn/goods-10993-DF10151-CEACAM8\\_Antibody.html](http://www.affbiotech.cn/goods-10993-DF10151-CEACAM8_Antibody.html)

MPO Polyclonal antibody; proteintech; 22225-1-AP

Vendor information: <https://www.ptgcn.com/Products/MPO-Antibody-22225-1-AP.htm>

OLIG2; Abcam; ab109186

Vendor information: <https://www.abcam.cn/products/primary-antibodies/olig2-antibody-epr2673-ab109186.html>

SOX2; Abcam; ab92494

Vendor information: <https://www.abcam.cn/products/primary-antibodies/sox2-antibody-epr3131-ab92494.html>

Anti-CD68 ; proteintech; 25747-1-AP

Vendor information: <https://www.ptgcn.com/products/CD68-Antibody-25747-1-AP.htm>

Anti-CD3 ; proteintech; 17617-1-AP

Vendor information: <https://www.ptgcn.com/products/CD3E-Antibody-17617-1-AP.htm>

SOX9; Servicebio; GB14171-50

Vendor information: <https://www.servicebio.cn/goodsdetail?id=22108>

GFAP; Servicebio; GB11096-100

Vendor information: <https://www.servicebio.cn/goodsdetail?id=1376>

TMEM119; Abcam; ab306583

Vendor information: <https://www.abcam.cn/products/primary-antibodies/tmem119-antibody-epr25865-89-ab306583.html>

iF440-Tyramide ; Servicebio ; G1250

Vendor information: <https://www.servicebio.cn/goodsdetail?id=21652>

iF488-Tyramide ; Servicebio ; G1231

Vendor information: <https://www.servicebio.cn/goodsdetail?id=21962>

iF555-Tyramide ; Servicebio ; G1233

Vendor information: <https://www.servicebio.cn/goodsdetail?id=21964>

iF594-Tyramide ; Servicebio ; G1242

Vendor information: <https://www.servicebio.cn/goodsdetail?id=21965>

iF647-Tyramide ; Servicebio ; G1232

Vendor information: <https://www.servicebio.cn/goodsdetail?id=21963>

## Plants

Seed stocks

N/A

Novel plant genotypes

N/A

Authentication

N/A

## Magnetic resonance imaging

### Experimental design

Design type

resting state; block design.

Design specifications

Four blocks in each subject.

Behavioral performance measures

correct button press; range.

## Acquisition

|                               |                                                                                                                                                                                                                                                                                                                                                                                                                                                                                                                                                                                                                                                                                                                                                                                                                                                                                                                                                                                                                                                                                                                                                                                                                                                                                                                                                     |
|-------------------------------|-----------------------------------------------------------------------------------------------------------------------------------------------------------------------------------------------------------------------------------------------------------------------------------------------------------------------------------------------------------------------------------------------------------------------------------------------------------------------------------------------------------------------------------------------------------------------------------------------------------------------------------------------------------------------------------------------------------------------------------------------------------------------------------------------------------------------------------------------------------------------------------------------------------------------------------------------------------------------------------------------------------------------------------------------------------------------------------------------------------------------------------------------------------------------------------------------------------------------------------------------------------------------------------------------------------------------------------------------------|
| Imaging type(s)               | structural, contrast-enhanced imaging , pseudo-continuous ASL(pCASL), diffusion-weighted imaging (DWI) ,diffusion tensor imaging (DTI)                                                                                                                                                                                                                                                                                                                                                                                                                                                                                                                                                                                                                                                                                                                                                                                                                                                                                                                                                                                                                                                                                                                                                                                                              |
| Field strength                | 3.0 Tesla scanner (SIGNA Pioneer, GE, USA)                                                                                                                                                                                                                                                                                                                                                                                                                                                                                                                                                                                                                                                                                                                                                                                                                                                                                                                                                                                                                                                                                                                                                                                                                                                                                                          |
| Sequence & imaging parameters | The sequences included T1-weighted imaging (axial spin-echo (SE) sequences, repetition time (TR)= 2,242.2ms; echo time (TE) = 29.5ms; field of view (FOV): 240*240 mm <sup>2</sup> ; matrix:512*512; slice thickness: 5 mm without slice gap), T2-weighted imaging (axial turbo SE sequences: TR= 4,256.5ms; TE= 90.1ms; FOV: 240*240 mm <sup>2</sup> ; matrix:512*512; slice thickness: 5 mm without slice gap), contrast-enhanced imaging (TR = 4,852ms; TE = 10.7ms; FOV = 240*240 mm <sup>2</sup> ; matrix:128*128; slice thickness= 4 mm; 18 slices without slice gap), pseudo-continuous ASL(pCASL) (TR=4891ms; TE=10.6ms; post-labeling delay time=2025ms; FOV=240*240mm <sup>2</sup> ; Flip angle =111°; slice thickness=4.0mm; NEX=3), diffusion-weighted imaging (DWI) (single-shot SE echo-planar sequence: TR = 3,467ms; TE =77.1ms; flip angle = 90; FOV: 240*240 mm <sup>2</sup> ; matrix:256*256; slice thickness =6-7.5 mm, diffusion sensitizing gradients were applied sequentially in the X, Y, and Z directions with b values of 0 and 1000 mm <sup>2</sup> /s.), and diffusion tensor imaging (DTI) (single-shot echo-planar sequence: TR = 8,000 ms; TE =96.6 ms; flip angle = 90; FOV: 260*260mm <sup>2</sup> ; matrix: 256*256; slice thickness =4-4.4 mm; b values (0, 1000 mm <sup>2</sup> /s) scanned in 24 directions). |
| Area of acquisition           | Brain                                                                                                                                                                                                                                                                                                                                                                                                                                                                                                                                                                                                                                                                                                                                                                                                                                                                                                                                                                                                                                                                                                                                                                                                                                                                                                                                               |
| Diffusion MRI                 | <input type="checkbox"/> Used <input checked="" type="checkbox"/> Not used                                                                                                                                                                                                                                                                                                                                                                                                                                                                                                                                                                                                                                                                                                                                                                                                                                                                                                                                                                                                                                                                                                                                                                                                                                                                          |

## Preprocessing

|                            |                                                                                                                                                                                                                                                                                                                                                                                                                                          |
|----------------------------|------------------------------------------------------------------------------------------------------------------------------------------------------------------------------------------------------------------------------------------------------------------------------------------------------------------------------------------------------------------------------------------------------------------------------------------|
| Preprocessing software     | Details of data processing and analysis are provided in the "Methods" section.<br>The original MR images were transferred to a workstation (GE Advantage Workstation 4.7). Function Tool software was used to manually correct and denoise the images, and finally, images demonstrating cerebral blood flow (CBF) images were obtained.                                                                                                 |
| Normalization              | Details of normalization are provided in the "Method" section.<br>The raw ASL image data were imported to a GE workstation (ADW4.7) to generate CBF maps. This software processes pCASL data in a standardized one-click mode.                                                                                                                                                                                                           |
| Normalization template     | Details of normalization template are provided in the "Methods" section<br>The CBF maps were subsequently preprocessing using statistical parametric mapping (SPM, <a href="http://www.fil.ion.ucl.ac.uk/spm/software/spm12">http://www.fil.ion.ucl.ac.uk/spm/software/spm12</a> ) implemented in MATLAB, which included registration, partial volume correction, normalization, and smoothing.                                          |
| Noise and artifact removal | Function Tool software was used to manually correct and denoise the images, and finally, images demonstrating cerebral blood flow (CBF) images were obtained.<br><br>Smoothing was performed with an isotropic Gaussian kernel filter of 6 mm full width at half maximum (FWHM).                                                                                                                                                         |
| Volume censoring           | The original structural and multi-parametric MR images were also used to visualize the PBZ reconstructions in three-dimensions (3-D) on a medical imaging support platform (Tuomeng Technology, <a href="http://www.hljtmkj.com">http://www.hljtmkj.com</a> ). The three regions PBZ(included Tumor), Tumor and HBI were extracted separately and the longest diameter and volume were calculated automatically in the support platform. |

## Statistical modeling & inference

|                                           |                                                                                                                                                                                                                                                                                                                                                                                                                       |
|-------------------------------------------|-----------------------------------------------------------------------------------------------------------------------------------------------------------------------------------------------------------------------------------------------------------------------------------------------------------------------------------------------------------------------------------------------------------------------|
| Model type and settings                   | Not applicable.                                                                                                                                                                                                                                                                                                                                                                                                       |
| Effect(s) tested                          | Not applicable.                                                                                                                                                                                                                                                                                                                                                                                                       |
| Specify type of analysis:                 | <input type="checkbox"/> Whole brain <input type="checkbox"/> ROI-based <input checked="" type="checkbox"/> Both                                                                                                                                                                                                                                                                                                      |
| Anatomical location(s)                    | 1. The parenchymal part of the tumor (contrast-enhancing lesion) 2. The GI area (usually higher CBF/ lower ADC area) and 3. The OPI area (the area usually lower CBF/higher ADC and far from the GI). Of note, in this study, the PBZ (consisting of GI and OPI) was defined as the tissue surrounding the contrast-enhancing lesion at a distance of < 1 cm and was considered the interface of the tumor and brain. |
| Statistic type for inference              | Not applicable.                                                                                                                                                                                                                                                                                                                                                                                                       |
| (See <a href="#">Eklund et al. 2016</a> ) |                                                                                                                                                                                                                                                                                                                                                                                                                       |
| Correction                                | Not applicable.                                                                                                                                                                                                                                                                                                                                                                                                       |

## Models & analysis

| n/a                                 | Involvement in the study                                              |
|-------------------------------------|-----------------------------------------------------------------------|
| <input checked="" type="checkbox"/> | <input type="checkbox"/> Functional and/or effective connectivity     |
| <input checked="" type="checkbox"/> | <input type="checkbox"/> Graph analysis                               |
| <input checked="" type="checkbox"/> | <input type="checkbox"/> Multivariate modeling or predictive analysis |
